# Supplementary material for: A Mass Spectrometry Strategy for Protein Quantification Based on the Differential Alkylation of Cysteines Using Iodoacetamide and Acrylamide
Source: MDPI journal article supplement (doi:10.3390/ijms25094656), 2024-04-25

# A Mass Spectrometry Strategy for Protein Quantification Based on the Differential Alkylation of Cysteines by Iodoacetamide and Acrylamide

Dávid Virág <sup>1</sup>, Gitta Schlosser <sup>2</sup>, Adina Borbély <sup>2</sup>, Gabriella Gellén <sup>2</sup>, Dávid Papp <sup>2,3</sup>, Zoltán Kaleta <sup>4</sup>, Borbála Dalmadi-Kiss <sup>1</sup>, István Antal <sup>1</sup>, and Krisztina Ludányi <sup>1,\*</sup>

<sup>1</sup> Department of Pharmaceutics, Semmelweis University, Hógyes Endre utca 7., H-1092 Budapest, Hungary; virag.david@semmelweis.hu (D.V.); kiss.borbala@semmelweis.hu (B.D.K.); antal.istvan@semmelweis.hu (I.A.)

<sup>2</sup> MTA-ELTE Lendület Ion Mobility Mass Spectrometry Research Group, Institute of Chemistry, Faculty of Science, ELTE Eötvös Loránd University, Pázmány Péter sétány 1/A, H-1117 Budapest, Hungary; gitta.schlosser@ttk.elte.hu (G.S.) adina.borbely@ttk.elte.hu (A.B.); david.papp@ttk.elte.hu (D.P.); gabgellen@staff.elte.hu (G.G.)

<sup>3</sup> Hevesy György PhD School of Chemistry, Institute of Chemistry, ELTE Eötvös Loránd University, Pázmány Péter sétány 1/A, H-1117 Budapest, Hungary

<sup>4</sup> Department of Organic Chemistry, Semmelweis University, Hógyes Endre utca 7., H-1092 Budapest, Hungary; kaleta.zoltan@semmelweis.hu (Z.K.)

\* Correspondence: ludanyi.krisztina@semmelweis.hu

*Supplementary Materials*

**Table S1. Settings for the extended gradient method A (30 min), B (45 min), C (60 min), D (90 min).**

| B%      | Time (min)  |             |             |             |
|---------|-------------|-------------|-------------|-------------|
|         | Method A    | Method B    | Method C    | Method D    |
| 5 → 60  | 0.00-18.00  | 0.00-33.00  | 0.00-48.00  | 0.00-78.00  |
| 60 → 85 | 18.01-18.50 | 33.01-33.50 | 48.01-48.50 | 78.01-78.50 |
| 85      | 18.51-23.50 | 33.51-38.50 | 48.51-53.50 | 78.51-83.50 |
| 85 → 5  | 23.51-24.00 | 38.51-39.00 | 53.51-54.00 | 83.51-84.00 |
| 5       | 24.01-30.00 | 39.01-45.00 | 54.01-60.00 | 84.01-90.00 |

**Table S2. Settings for the targeted MS/MS experiments.**

| Signature Peptide<br>Sequence   | Time Segment<br>(min) | LM and HM<br>Resolution | Scan Freq<br>(sec) | CE<br>(V) | Precursor Ion |       |       |
|---------------------------------|-----------------------|-------------------------|--------------------|-----------|---------------|-------|-------|
|                                 |                       |                         |                    |           | z             | m/z   |       |
|                                 |                       |                         |                    |           |               | Light | Heavy |
| LVRPEVDVMCTAF<br>HDNEETFLK      | 10.8-11.8             | 4.7, 15.0               | 0.3                | 24        | +4            | 663.6 | 666.1 |
| QNC ELF EQLGEYK                 | 10.9-11.9             | 4.7, 15.0               | 0.3                | 38        | +2            | 829.4 | 836.4 |
| SHCIAEVENDEMP<br>ADLPSLAADFVESK | 11.9-12.9             | 4.7, 15.0               | 0.3                | 37        | +3            | 992.5 | 997.2 |

**Figure S1. Evaluating the alkylation efficiency of acrylamide on Peptide01 (A), Peptide02 (B), and Peptide03 (C).** Solid red line represents the detector response when monitoring the theoretical  $m/z$  values of the AA-labeled peptides with 0.1 unit accuracy at the most abundant charge state, while dashed green line shows the theoretical  $m/z$  value of the non-labeled counterpart with 0.1 unit accuracy at the same charge state in a HQC sample.

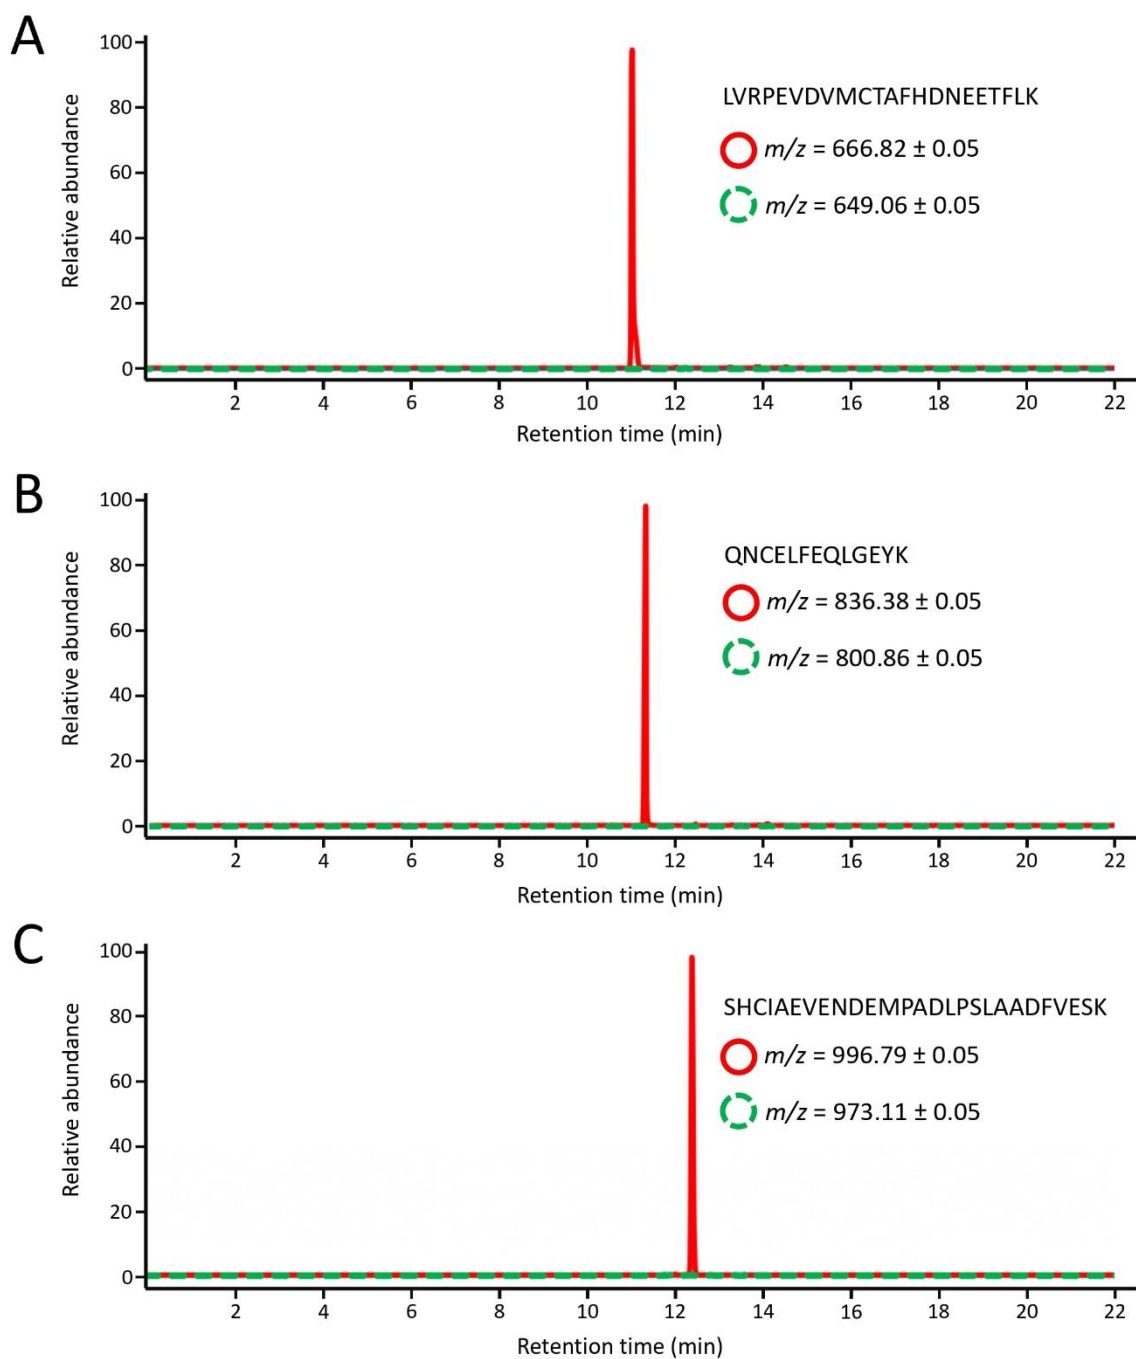

Supplement: s1 [file s1]
